# Supplementary material for: Haloalkalitolerant Fungi from Sediments of the Big Tambukan Saline Lake (Northern Caucasus): Diversity and Antimicrobial Potential
Source: MDPI journal article supplement (doi:10.3390/microorganisms11102587), 2023-10-19
Supplement: s1 [file s1]

## Supplementary

**Table S1.** Sequences fungal species used in this study with their GenBank accession numbers

| Species                                                                                        | Isolate No.                                 | GenBank accession No. |              |
|------------------------------------------------------------------------------------------------|---------------------------------------------|-----------------------|--------------|
|                                                                                                |                                             | ITS                   | beta-tubulin |
| <i>Acremonium alternatum</i> Link                                                              | CBS 407.66 T                                | NR_144913.1           | -            |
| <i>Acremonium egyptiacum</i> (J.F.H. Beyma) W. Gams                                            | CBS 114785 T                                | NR_163807.1           | -            |
|                                                                                                | A130                                        | KC987166              | -            |
|                                                                                                | A101                                        | KC987139              | -            |
|                                                                                                | CBS 124.42                                  | MH856101              | -            |
|                                                                                                | <b>p19 / SLF 0218.0913</b>                  | <b>OR335864</b>       | -            |
|                                                                                                | <b>p33 / SLF 0218.1001</b>                  | <b>OR335865</b>       | -            |
| <i>Alternaria alternata</i> (Fr.) Keissl.                                                      | CBS 916.96 T                                | FJ196306              | -            |
|                                                                                                | CBS 137513                                  | KJ443247              | -            |
|                                                                                                | <b>p18 / SLF 0218.0604</b>                  | <b>OR335862</b>       | -            |
|                                                                                                | <b>p44 / SLF 0218.0306</b>                  | <b>OR335861</b>       | -            |
| <i>Alternaria chlamydospora</i> Mouch.                                                         | CBS 491.72 T                                | KC584189              | -            |
| <i>Alternaria molesta</i> E.G. Simmons                                                         | CBS 548.81 T                                | KC584205              | -            |
|                                                                                                | CBS 137524                                  | KJ443261              | -            |
| <i>Alternaria obclavata</i> (Crous & U. Braun) Woudenb. & Crous                                | CBS 124120 T                                | KC584225              | -            |
| <i>Alternaria shukurtuzi</i> Bilanenko, Georgieva & Grum-Grzhim.                               | CBS 137520 T                                | KJ443257              | -            |
| <i>Alternaria solaridae</i> E.G. Simmons                                                       | CBS 118387 T                                | KC584218              | -            |
| <i>Alternaria kulundae</i> Bilanenko, Georgieva & Grum-Grzhim.                                 | CBS 137525 T                                | KJ443262              | -            |
|                                                                                                | CBS 137522                                  | KJ443259              | -            |
|                                                                                                | CBS 137521                                  | KJ443258              | -            |
| <i>Alternaria petuchovskoi</i> Bilanenko, Georgieva & Grum-Grzhim.                             | CBS 137517 T                                | KJ443254              | -            |
| <i>Aspergillus alboluteus</i> F. Sklenar, Jurjevič, Ezekiel, Houbraken & Hubka                 | CBS 145855 T                                | MW448663              | -            |
| <i>Aspergillus albobiviridis</i> J.P.Z. Siqueira, GenJ.P.Z. Siqueira, Gené, F. Sklenar & Hubka | CBS 142665 T                                | LT798909              | -            |
| <i>Aspergillus ardalensis</i> A. Nováková, Hubka, Kolařík & S.W. Peterson                      | CBS 134372 T                                | FR733808              | -            |
| <i>Aspergillus creber</i> Jurjevič, S.W. Peterson & B.W. Horn                                  | CBS 145749 T                                | NR_135442             | -            |
| <i>Aspergillus flavipes</i> (Bainier & R. Sartory) Thom & Church                               | NRRL 302 T                                  | EF669591              | -            |
| <i>Aspergillus fumigatus</i> Fresen.                                                           | CBS 133.61 T                                | EF669931              | -            |
| <i>Aspergillus glaucus</i> (L.) Link                                                           | CBS 516.65 T                                | EF652052              | -            |
| <i>Aspergillus iizukae</i> Sugiyama                                                            | CBS 541.69 T                                | OL711774.1            | -            |
|                                                                                                | CBS 138188 (ex-type of <i>A. capensis</i> ) | OL711795              | -            |
| <i>Aspergillus inusitatus</i> F. Sklenar, C. Silva Pereira, Houbraken & Hubka                  | CBS 147044 T                                | MW448669              | -            |
| <i>Aspergillus lanuginosus</i> F. Sklenar & Hubka                                              | NRRL 4610 T                                 | EF669604              | -            |
| <i>Aspergillus lupppiae</i> Hubka, A. Novkov, M. Kolak & S.W. Peterson                         | CBS 653.74 T                                | EF669617              | -            |
| <i>Aspergillus micronesiensis</i> Visagie, Hirooka & Samson                                    | CBS 138183 T                                | KJ775548              | -            |
| <i>Aspergillus movilensis</i> A. Nováková, Hubka, Kolařík & S.W. Peterson                      | CBS 134395 T                                | HG915904              | -            |
| <i>Aspergillus neoflavipes</i> Hubka, A. Novkov, M. Kolak & S.W. Peterson                      | CBS 260.73 T                                | EF669614              | -            |

|                                                                                |                            |                 |                 |
|--------------------------------------------------------------------------------|----------------------------|-----------------|-----------------|
| <i>Aspergillus polyporicola</i> Hubka, A. Nováková, M. Kolarík & S.W. Peterson | NRRL 32683 T               | EF669595        | -               |
| <i>Aspergillus spelaeus</i> A. Nováková, Hubka, M. Kolarík & S.W. Peterson     | CBS 134371 T               | HG915905        | -               |
| <i>Aspergillus subversicolor</i> Jurjević, S.W. Peterson & B.W. Horn           | CBS 145751 T               | JQ301894        | -               |
| <i>Aspergillus suttoniae</i> J.P.Z. Siqueira, Gené, Dania García & Guarro      | UTHSCSA DI14-215 T         | LT899487        | -               |
| <i>Aspergillus sydowii</i> (Bainier & Sartory) Thom & Church                   | CBS 593.65 T               | EF652451        | -               |
| <i>Aspergillus templicola</i> Visagie, Hirooka & Samson                        | CBS 138181 T               | KJ775545        | -               |
| <i>Aspergillus urmiensis</i> Arzanlou, Houbroken & Samadi                      | CBS 139558 T               | KP987073        | -               |
| <i>Aspergillus versicolor</i> (Vuill.) Tirab.                                  | CBS 583.65 T               | EF652442        | -               |
| <b><i>Aspergillus</i> sp. sect. <i>Flavipedes</i> ser. <i>Flavipedes</i></b>   | <b>p14 / SLF 0218.0503</b> | <b>OR335848</b> | -               |
| <b><i>Aspergillus</i> sp. sect. <i>Flavipedes</i> ser. <i>Flavipedes</i></b>   | <b>p35 / SLF 0218.0110</b> | <b>OR335851</b> | -               |
| <b><i>Aspergillus</i> sp. sect. <i>Flavipedes</i> ser. <i>Spelaei</i></b>      | <b>p11 / SLF 0218.0402</b> | <b>OR335847</b> | -               |
| <b><i>Aspergillus</i> sp. sect. <i>Flavipedes</i> ser. <i>Spelaei</i></b>      | <b>p34 / SLF 0218.0911</b> | <b>OR335850</b> | -               |
| <b><i>Aspergillus</i> sp. sect. <i>Nidulantes</i> ser. <i>Versicolores</i></b> | <b>p10 / SLF 0218.0315</b> | <b>OR335846</b> | -               |
| <b><i>Aspergillus</i> sp. sect. <i>Nidulantes</i> ser. <i>Versicolores</i></b> | <b>p16 / SLF 0218.0914</b> | <b>OR335849</b> | -               |
| <i>Chordomyces albus</i> A. Giraldo, Deanna A. Sutton & Guarro                 | CBS 987.87 T               | DQ825970        | -               |
| <i>Chordomyces antarcticus</i> Bilanenko, Georgieva & Grum-Grzhim.             | CBS 120045 T               | KJ443241        | -               |
| <b><i>Chordomyces</i> sp.</b>                                                  | <b>p42 / SLF 0218.0408</b> | <b>OR335860</b> | -               |
| <i>Curvularia homomorpha</i> (Luttr. & Rogerson) Y.P. Tan & R.G. Shivas        | CBS 156.60 T               | JN192380        | -               |
| <i>Emericellopsis alkalina</i> Bilanenko & Georgieva                           | CBS 127350 T               | KC987171        | KC987133        |
|                                                                                | A117                       | KC987154        | KC987116        |
|                                                                                | A118                       | KC987155        | KC987117        |
|                                                                                | A119                       | KC987156        | KC987118        |
|                                                                                | CBS 120049                 | KC987170        | KC987132        |
|                                                                                | <b>p30 / SLF 0218.0608</b> | <b>OR335874</b> | <b>OR287057</b> |
|                                                                                | <b>p36 / SLF 0218.0313</b> | <b>OR335876</b> | <b>OR287059</b> |
|                                                                                | <b>p43 / SLF 0218.1002</b> | <b>OR335882</b> | <b>OR287065</b> |
| <i>Emericellopsis atlantica</i> L.W. Hou, Crous, Rämä & Hagestad               | CBS 147198 T               | OL539742.1      | OL634966        |
| <i>Emericellopsis cladophorae</i> M. Gonçalves, T. Vicente & A. Alves          | CMG25 T                    | MK986711        | MK984311        |
| <i>Emericellopsis donezkii</i> Beliakova                                       | CBS 489.71 T               | NR_156195.1     | AY632674.1      |
| <i>Emericellopsis enteromorphae</i> M. Gonçalves, T. Vicente & A. Alves        | CMG26 T                    | MK986712        | MK984312        |
| <i>Emericellopsis glabra</i> (J.F.H. Beyma) Backus & Orpurt                    | CBS 119.40 T               | NR_145024.1     | AY632673.1      |
| <i>Emericellopsis humicola</i> (Cain) Cain ex Grosklags & Swift                | CBS 180.56 T               | NR_145025.1     | AY632675.1      |
| <i>Emericellopsis koreana</i> Hyang B. Lee, S.J. Jeon & T.T.T. Nguyen          | CNUFC-MOG1-1 T             | MH173304        | MH243035        |
| <i>Emericellopsis maritima</i> Beliakova                                       | CBS 491.71 T               | KC987175        | KC987137        |
| <i>Emericellopsis microspora</i> Backus & Orpurt                               | CBS 380.62 T               | NR_156196.1     | AY632679.1      |
| <i>Emericellopsis minima</i> Stolk                                             | CBS 190.55 T               | KC987173        | KC987135        |
| <i>Emericellopsis mirabilis</i> (Malan) Stolk                                  | CBS 177.53 T               | AY632656        | -               |
|                                                                                | NBRC 114971                | MW595829        | LC605902        |
| <i>Emericellopsis pallida</i> Beliakova                                        | CBS 490.71 T               | KC987176        | KC987138        |
| <i>Emericellopsis persica</i> Papizadeh, Wijayaw., Soudi & K.D. Hyde           | IBRC-M 30046 T             | KX668543        | -               |
| <i>Emericellopsis phycophila</i> M. Gonçalves, T. Vicente & A. Alves           | CMG15 T                    | MK986701        | MK984301        |

|                                                                                                     |                            |                 |                 |
|-----------------------------------------------------------------------------------------------------|----------------------------|-----------------|-----------------|
| <i>Emericellopsis pusilla</i> P.N. Mathur, Sukapure & Thirum.                                       | CBS 226.62 T               | MH858143        | -               |
| <i>Emericellopsis robusta</i> Emden & W. Gams                                                       | CBS 105.70 T               | MH859510        | -               |
|                                                                                                     | CBS 489.73                 | AY632664        | AY632680        |
| <i>Emericellopsis salmonea</i> (W. Gams & Lodha) L.W. Hou, L. Cai & Crous                           | CBS 721.71 T               | MH860309        | -               |
| <i>Emericellopsis salmosynnemata</i> Grosklags & Swift                                              | CBS 182.56 T               | MH857571.1      | -               |
| <i>Emericellopsis stolckiae</i> D.E. Davidson & M. Chr.                                             | CBS 159.71 T               | NR_156197.1     | AY632684.1      |
| <i>Emericellopsis terricola</i> J.F.H. Beyma                                                        | CBS 120.40 T               | U57676          | -               |
|                                                                                                     | CBS 229.59                 | AY632662        | AY632678        |
| <i>Emericellopsis brunneiguttula</i> L.W. Hou, L. Cai & Crous                                       | CBS 111360 T               | OQ429545        | AY632689        |
| <i>Emericellopsis exuviaria</i> (Sigler, Zuccaro, Summerbell & Paré) L.W. Hou, L. Cai & Crous       | CBS 113360 T               | AY882946        | AY882947        |
| <i>Emericellopsis fimetaria</i> (Pers.) L.W. Hou, L. Cai & Crous                                    | CBS 176.60                 | AY632665.1      | AY632681.1      |
|                                                                                                     | CBS 382.62                 | AY632666        | AY632682        |
|                                                                                                     | CBS 117.84                 | MH861705.1      | -               |
|                                                                                                     | CBS 628.85                 | MH861906.1      | -               |
|                                                                                                     | <b>p24 / SLF 0218.0620</b> | <b>OR335869</b> | <b>OR287052</b> |
|                                                                                                     | <b>p26 / SLF 0218.0308</b> | <b>OR335871</b> | <b>OR287054</b> |
|                                                                                                     | <b>p29 / SLF 0218.0609</b> | <b>OR335873</b> | <b>OR287056</b> |
| <i>Emericellopsis fuci</i> (Summerbell, Zuccaro & W. Gams) L.W. Hou, L. Cai & Crous                 | CBS 112868 T               | AY632653        | AY632690.1      |
| <i>Emericellopsis moniliformis</i> (A. Giraldo, Deanna A. Sutton & Guarro) L.W. Hou, L. Cai & Crous | CBS 139051 T               | LN810516        | LN810523        |
| <i>Emericellopsis tubakii</i> (Gams) L.W. Hou, L. Cai & Crous                                       | CBS 790.69 T               | MH859429        | -               |
| <i>Emericellopsis</i> sp.                                                                           | A104                       | KC987141        | KC987103        |
| <i>Emericellopsis</i> sp.                                                                           | A105                       | KC987142        | KC987104        |
| <i>Emericellopsis</i> sp.                                                                           | A106                       | KC987143        | KC987105        |
| <i>Emericellopsis</i> sp.                                                                           | A107                       | KC987144        | KC987106        |
| <i>Emericellopsis</i> sp.                                                                           | A108                       | KC987145        | KC987107        |
| <i>Emericellopsis</i> sp.                                                                           | A110                       | KC987147        | KC987109        |
| <i>Emericellopsis</i> sp.                                                                           | A111                       | KC987148        | KC987110        |
| <i>Emericellopsis</i> sp.                                                                           | E102                       | KC987172        | KC987134        |
| <b><i>Emericellopsis</i> sp.</b>                                                                    | <b>p20 / SLF 0218.0117</b> | <b>OR335866</b> | <b>OR287049</b> |
| <b><i>Emericellopsis</i> sp.</b>                                                                    | <b>p21 / SLF 0218.0708</b> | <b>OR335867</b> | <b>OR287050</b> |
| <b><i>Emericellopsis</i> sp.</b>                                                                    | <b>p22 / SLF 0218.0101</b> | <b>OR335868</b> | <b>OR287051</b> |
| <b><i>Emericellopsis</i> sp.</b>                                                                    | <b>p25 / SLF 0218.0601</b> | <b>OR335870</b> | <b>OR287053</b> |
| <b><i>Emericellopsis</i> sp.</b>                                                                    | <b>p27 / SLF 0218.0504</b> | <b>OR335872</b> | <b>OR287055</b> |
| <b><i>Emericellopsis</i> sp.</b>                                                                    | <b>p32 / SLF 0218.0908</b> | <b>OR335875</b> | <b>OR287058</b> |
| <b><i>Emericellopsis</i> sp.</b>                                                                    | <b>p37 / SLF 0218.0401</b> | <b>OR335877</b> | <b>OR287060</b> |
| <b><i>Emericellopsis</i> sp.</b>                                                                    | <b>p38 / SLF 0218.0203</b> | <b>OR335878</b> | <b>OR287061</b> |
| <b><i>Emericellopsis</i> sp.</b>                                                                    | <b>p39 / SLF 0218.0701</b> | <b>OR335879</b> | <b>OR287062</b> |
| <b><i>Emericellopsis</i> sp.</b>                                                                    | <b>p40 / SLF 0218.0702</b> | <b>OR335880</b> | <b>OR287063</b> |
| <b><i>Emericellopsis</i> sp.</b>                                                                    | <b>p41 / SLF 0218.0312</b> | <b>OR335881</b> | <b>OR287064</b> |
| <b><i>Emericellopsis</i> sp.</b>                                                                    | <b>p45 / SLF 0218.0201</b> | <b>OR335883</b> | <b>OR287066</b> |
| <b><i>Emericellopsis</i> sp.</b>                                                                    | <b>p46 / SLF 0218.0801</b> | <b>OR335884</b> | <b>OR287067</b> |
| <b><i>Emericellopsis</i> sp.</b>                                                                    | <b>p49 / SLF 0218.1006</b> | <b>OR335885</b> | <b>OR287068</b> |
| <i>Furcasterigmium furcatum</i> (C. Moreau & Moreau ex W. Gams) Giraldo López & Crous               | CBS 122.42 T               | AY378154        | -               |
| <i>Fusarium algeriense</i> Laraba & O'Donnell                                                       | CBS 142638 T               | NR_158423.1     | -               |
| <i>Fusarium beomiforme</i> P.E. Nelson, Toussoun & L.W. Burgess                                     | CBS 100160 T               | MH862691.1      | -               |
|                                                                                                     | CBS 740.97                 | U61674          | -               |
| <i>Fusarium breve</i> (Sand.-Den. & Crous) O'Donnell, Geiser, Kasson & T. Aoki                      | CBS 144387 T               | LR583708        | -               |

|                                                                                                                                              |                            |                 |   |
|----------------------------------------------------------------------------------------------------------------------------------------------|----------------------------|-----------------|---|
| (= <i>Neocosmospora brevis</i> Sand.-Den. & Crous)                                                                                           |                            |                 |   |
| <i>Fusarium burgessii</i> M.H. Laurence, Summerell & E.C.Y. Liew                                                                             | CBS 125537 T               | NR_172292.1     | - |
| <i>Fusarium equiseti</i> (Corda) Sacc.                                                                                                       | CBS 307.94 NT              | MH862468.1      | - |
| <i>Fusarium incarnatum</i> (Desm.) Sacc.                                                                                                     | CBS 161.25 T               | MH854830.1      | - |
| <i>Fusarium mori</i> (Sand.-Den. & Crous) O'Donnell, Geiser, Kasson & T. Aoki<br>(= <i>Neocosmospora mori</i> Sand.-Den. & Crous)            | CBS 145467 T               | DQ094305        | - |
| <i>Fusarium neerlandicum</i> (Crous & Sand.-Den.) T. Aoki, Geiser & O'Donnell<br>(= <i>Neocosmospora neerlandica</i> Crous & Sand.-Den.)     | CBS 232.34 T               | MH855496.1      | - |
| <i>Fusarium paulenelsonii</i> T. Aoki, Geiser & O'Donnell<br>(= <i>Neocosmospora nelsonii</i> Crous & Sand.-Den.)                            | CBS 309.75 T               | MW827630        | - |
| <i>Fusarium pseudopisi</i> (Sand.-Den. & L. Lombard) T. Aoki, Geiser & O'Donnell (= <i>Neocosmospora pseudopisi</i> Sand.-Den. & L. Lombard) | CBS 266.50 T               | MH856618.1      | - |
| <i>Fusarium quercinum</i> O'Donnell, Geiser, Kasson & T. Aoki<br>(= <i>Neocosmospora quercicola</i> Sand.-Den. & Crous)                      | CBS 141.90 T               | LR583760        | - |
| <i>Fusarium regulare</i> (Sand.-Den. & Crous) O'Donnell, Geiser, Kasson & T. Aoki<br>(= <i>Neocosmospora regularis</i> Sand.-Den. & Crous)   | CBS 230.34 T               | LR583763        | - |
|                                                                                                                                              | CBS 190.35                 | LR583762        | - |
| <i>Fusarium silvicola</i> (Sand.-Den. & Crous) O'Donnell, Geiser, Kasson & T. Aoki<br>(= <i>Neocosmospora silvicola</i> Sand.-Den. & Crous)  | CBS 123846 T               | LR583766        | - |
| <i>Fusarium solani</i> (Mart.) Sacc. (= <i>Neocosmospora solani</i> (Mart.) L. Lombard & Crous)                                              | CBS 140079 ET              | KT313633        | - |
| <i>Fusarium solani</i> f. <i>pisi</i> (F.R. Jones) W.C. Snyder & H.N. Hansen (= <i>Neocosmospora pisi</i> (F.R. Jones) Sand.-Den. & Crous)   | CBS 181.29                 | MH855035.1      | - |
|                                                                                                                                              | CBS 123669                 | LR583753        | - |
|                                                                                                                                              | CBS 127118                 | MH864425.1      | - |
|                                                                                                                                              | CBS 188.34                 | MH855484.1      | - |
| <b><i>Fusarium</i> sp. complex burgessii</b>                                                                                                 | <b>p28 / SLF 0218.0204</b> | <b>OR335857</b> | - |
| <b><i>Fusarium</i> sp. complex incarnatum-equiseti</b>                                                                                       | <b>p7 / SLF 0218.0106</b>  | <b>OR335853</b> | - |
| <b><i>Fusarium</i> sp. complex incarnatum-equiseti</b>                                                                                       | <b>p12 / SLF 0218.0404</b> | <b>OR335855</b> | - |
| <b><i>Fusarium</i> sp. complex solani</b>                                                                                                    | <b>p9 / SLF 0218.0309</b>  | <b>OR335854</b> | - |
| <b><i>Fusarium</i> sp. complex solani</b>                                                                                                    | <b>p13 / SLF 0218.0405</b> | <b>OR335856</b> | - |
| <i>Gibellulopsis aquatica</i> Giraldo López & Crous                                                                                          | CBS 117131 T               | LR026720        | - |
| <i>Gibellulopsis catenata</i> Giraldo López & Crous                                                                                          | CBS 113951 T               | LR026721        | - |
| <i>Gibellulopsis fusca</i> (Thirum. & Sukapure) Giraldo Lopez & Crous                                                                        | CBS 560.65 T               | LR026724        | - |
| <i>Gibellulopsis nigrescens</i> (Pethybr.) Zare, W. Gams & Summerb.                                                                          | CBS 120949 NT              | LR026738        | - |
|                                                                                                                                              | CBS 179.40                 | LR026727        | - |
|                                                                                                                                              | <b>p17 / SLF 0218.0103</b> | <b>OR335859</b> | - |
| <i>Gibellulopsis serrae</i> (Maffei) Giraldo Lopez & Crous                                                                                   | CBS 290.30 T               | LR026742        | - |
|                                                                                                                                              | CBS 387.35                 | LR026745        | - |
|                                                                                                                                              | CBS 892.70                 | LR026755        | - |
|                                                                                                                                              | <b>p8 / SLF 0218.0302</b>  | <b>OR335858</b> | - |
| <b><i>Myriodontium keratinophilum</i> Samson &amp; Polon.</b>                                                                                | <b>p15 / SLF 0218.0510</b> | <b>OR335852</b> | - |
| <i>Penicillium allii-sativi</i> Frisvad, Houbraken & Samson                                                                                  | CBS 132074 T               | JX997021        | - |
| <i>Penicillium bialowiezense</i> K.M. Zalessky                                                                                               | CBS 227.28 T               | NR_165994.1     | - |
| <i>Penicillium brevicompactum</i> Dierckx                                                                                                    | CBS 257.29 T               | KF465776.1      | - |
| <i>Penicillium chrysogenum</i> Thom                                                                                                          | CBS 306.48 T               | MH856357.1      | - |
| <i>Penicillium confertum</i> (Frisvad, Filt. & Wicklow)                                                                                      | CBS 171.87 T               | JX997081        | - |

|                                                                                                |                             |                 |            |
|------------------------------------------------------------------------------------------------|-----------------------------|-----------------|------------|
| Frisvad                                                                                        |                             |                 |            |
| <i>Penicillium copticola</i> Houbraken, Frisvad & Samson                                       | CBS 127355 T                | JN617685        | -          |
| <i>Penicillium desertorum</i> Frisvad, Houbraken & Samson                                      | CBS 131543 T                | JX997011        | -          |
| <i>Penicillium dipodomyus</i> (Frisvad, Filt. & Wicklow) Banke, Frisvad & S. Rosend.           | CBS 110412 T                | MH862862.1      | -          |
| <i>Penicillium dokdoense</i> Hyang B. Lee & T.T.T. Nguyen                                      | JMRC:SF:013606 T            | MG906868        | -          |
| <i>Penicillium fennelliae</i> Stolk                                                            | CBS 711.68 T                | JX313169        | -          |
| <i>Penicillium flavigenum</i> Frisvad & Samson                                                 | CBS 419.89 T                | MH862182.1      | -          |
| <i>Penicillium halotolerans</i> Frisvad, Houbraken & Samson                                    | CBS 131537 T                | JX997005        | -          |
| <i>Penicillium kongii</i> Long Wang                                                            | HMAS 244382 T               | KC427191        | -          |
| <i>Penicillium mononematosum</i> (Frisvad, Filt. & Wicklow) Frisvad                            | CBS 172.87 T                | JX997082        | -          |
| <i>Penicillium nalgiovense</i> Laxa                                                            | CBS 352.48 T                | MH856385.1      | -          |
| <i>Penicillium neocrassum</i> R. Serra & S.W. Peterson                                         | CBS 122428 T                | DQ645805        | -          |
| <i>Penicillium rubens</i> Biourge                                                              | CBS 129667 T                | NR_111815.1     | -          |
| <i>Penicillium tardochrysogenum</i> Frisvad, Houbraken & Samson                                | CBS 132200 T                | JX997028        | -          |
| <i>Penicillium terrigenum</i> Houbraken, Frisvad & Samson                                      | CBS 127354 T                | NR_121515.1     | -          |
| <i>Penicillium vanluykii</i> Frisvad, Houbraken & Samson                                       | CBS 131539 T                | JX997007        | -          |
| <i>Penicillium</i> sp. sect. <i>Brevicompecta</i> ser. <i>Brevicompecta</i>                    | <b>p302 / SLF 0218.0562</b> | <b>OR335841</b> | -          |
| <i>Penicillium</i> sp. sect. <i>Brevicompecta</i> ser. <i>Brevicompecta</i>                    | <b>p48 / SLF 0218.1005</b>  | <b>OR335845</b> | -          |
| <i>Penicillium</i> sp. sect. <i>Chrysogena</i> ser. <i>Chrysogena</i>                          | <b>p2 / SLF 0218.0902</b>   | <b>OR335839</b> | -          |
| <i>Penicillium</i> sp. sect. <i>Chrysogena</i> ser. <i>Chrysogena</i>                          | <b>p301 / SLF 0218.0561</b> | <b>OR335840</b> | -          |
| <i>Penicillium</i> sp. sect. <i>Chrysogena</i> ser. <i>Chrysogena</i>                          | <b>p4 / SLF 0218.0915</b>   | <b>OR335842</b> | -          |
| <i>Penicillium</i> sp. sect. <i>Chrysogena</i> ser. <i>Chrysogena</i>                          | <b>p5 / SLF 0218.0903</b>   | <b>OR335843</b> | -          |
| <i>Penicillium</i> sp. sect. <i>Chrysogena</i> ser. <i>Chrysogena</i>                          | <b>p6 / SLF 0218.0802</b>   | <b>OR335844</b> | -          |
| <i>Penicillium</i> sp. sect. <i>Citrina</i> ser. <i>Copticularum</i>                           | <b>p1 / SLF 0218.0407</b>   | <b>OR335838</b> | -          |
| <i>Plectosphaerella cucumerina</i> (Lindf.) W. Gams                                            | CBS 137.37 T                | MH855856        | -          |
| <i>Pseudeurotium bakeri</i> C. Booth                                                           | CBS 878.71 T                | NR145345        | -          |
|                                                                                                | CBS 128112                  | MH864832.1      | -          |
|                                                                                                | <b>p47 / SLF 0218.1004</b>  | <b>OR335863</b> | -          |
| <i>Pseudeurotium desertorum</i> Mouchacca                                                      | CBS 986.72 T                | JX076946        | -          |
| <i>Pseudeurotium hygrophilum</i> (Sogonov, W. Gams, Summerb. & Schroers) Minnis & D.L. Lindner | CBS 102670 T                | NR_111128.1     | -          |
| <i>Pseudeurotium ovale</i> Stolk                                                               | CBS 389.54 T                | NR_145346.1     | -          |
| <i>Pseudeurotium zonatum</i> J.F.H. Beyma                                                      | CBS 329.36 T                | NR111127        | -          |
| <i>Stanjemonium grisellum</i> W. Gams, Schroers & M. Christensen                               | CBS 655.79 T                | AY632671        | AY632687.1 |
| <i>Thelebolus globosus</i> Brummelen & de Hoog                                                 | CBS 113940 T                | MH862951        | -          |

T - ex-type strains, NT - neotype strains. Accession numbers of sequences generated in this study are in bold.

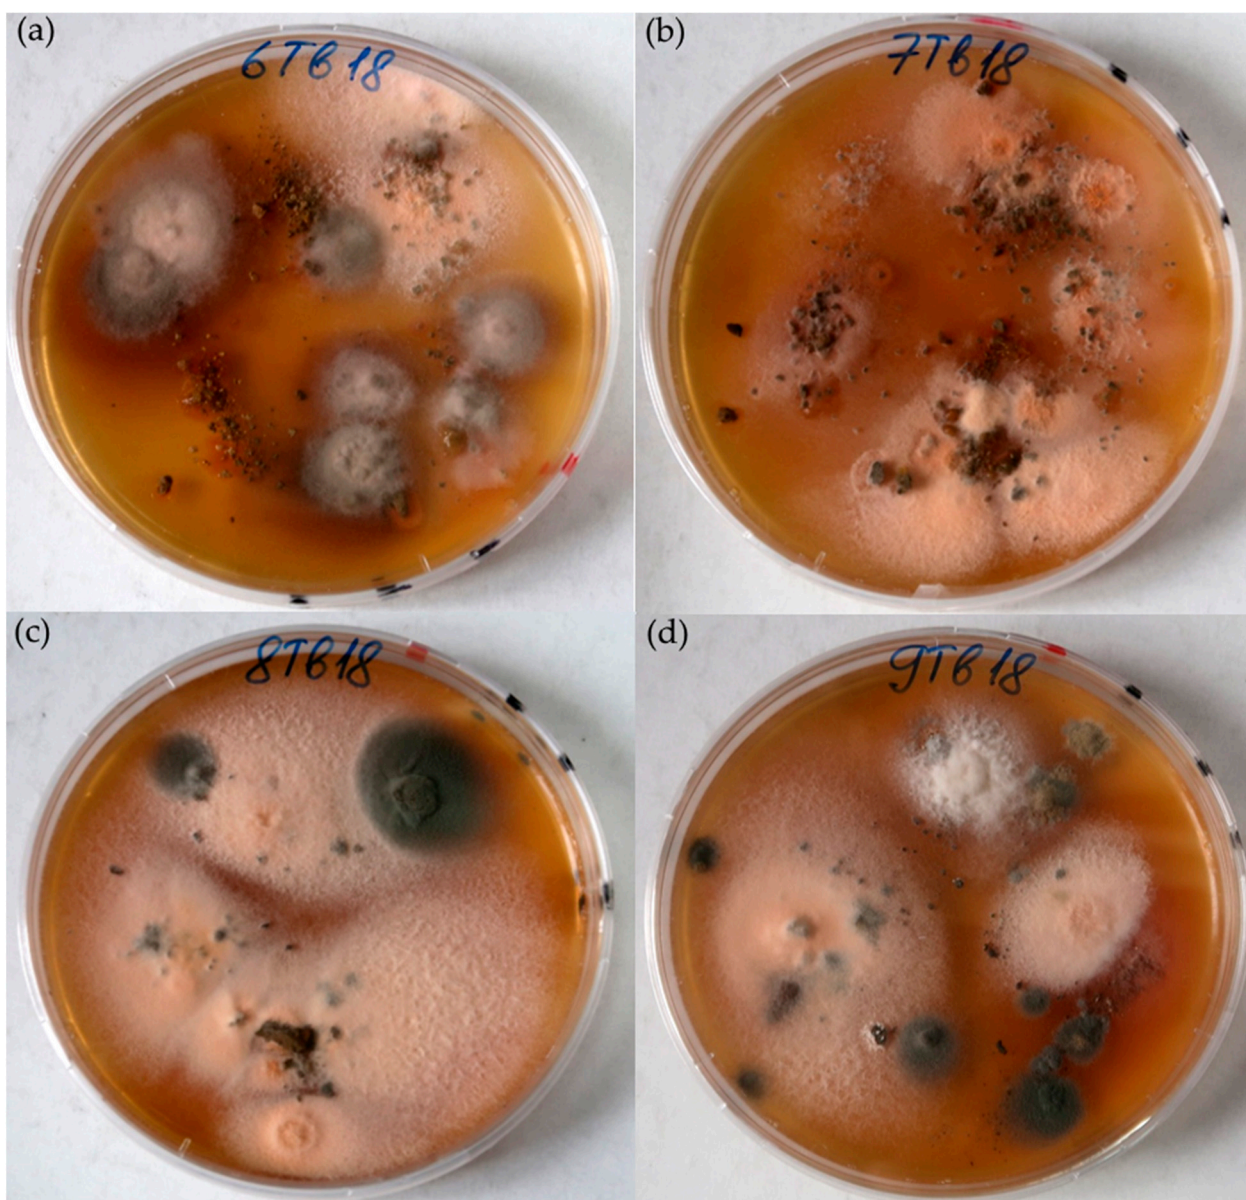

**Figure S1.** Samples of sediments of the Big Tambukan Lake on AA medium after 14 days of incubation: **a** – sample No 6; **b** – sample No 7; **c** – sample No 8; **d** – sample No 9.



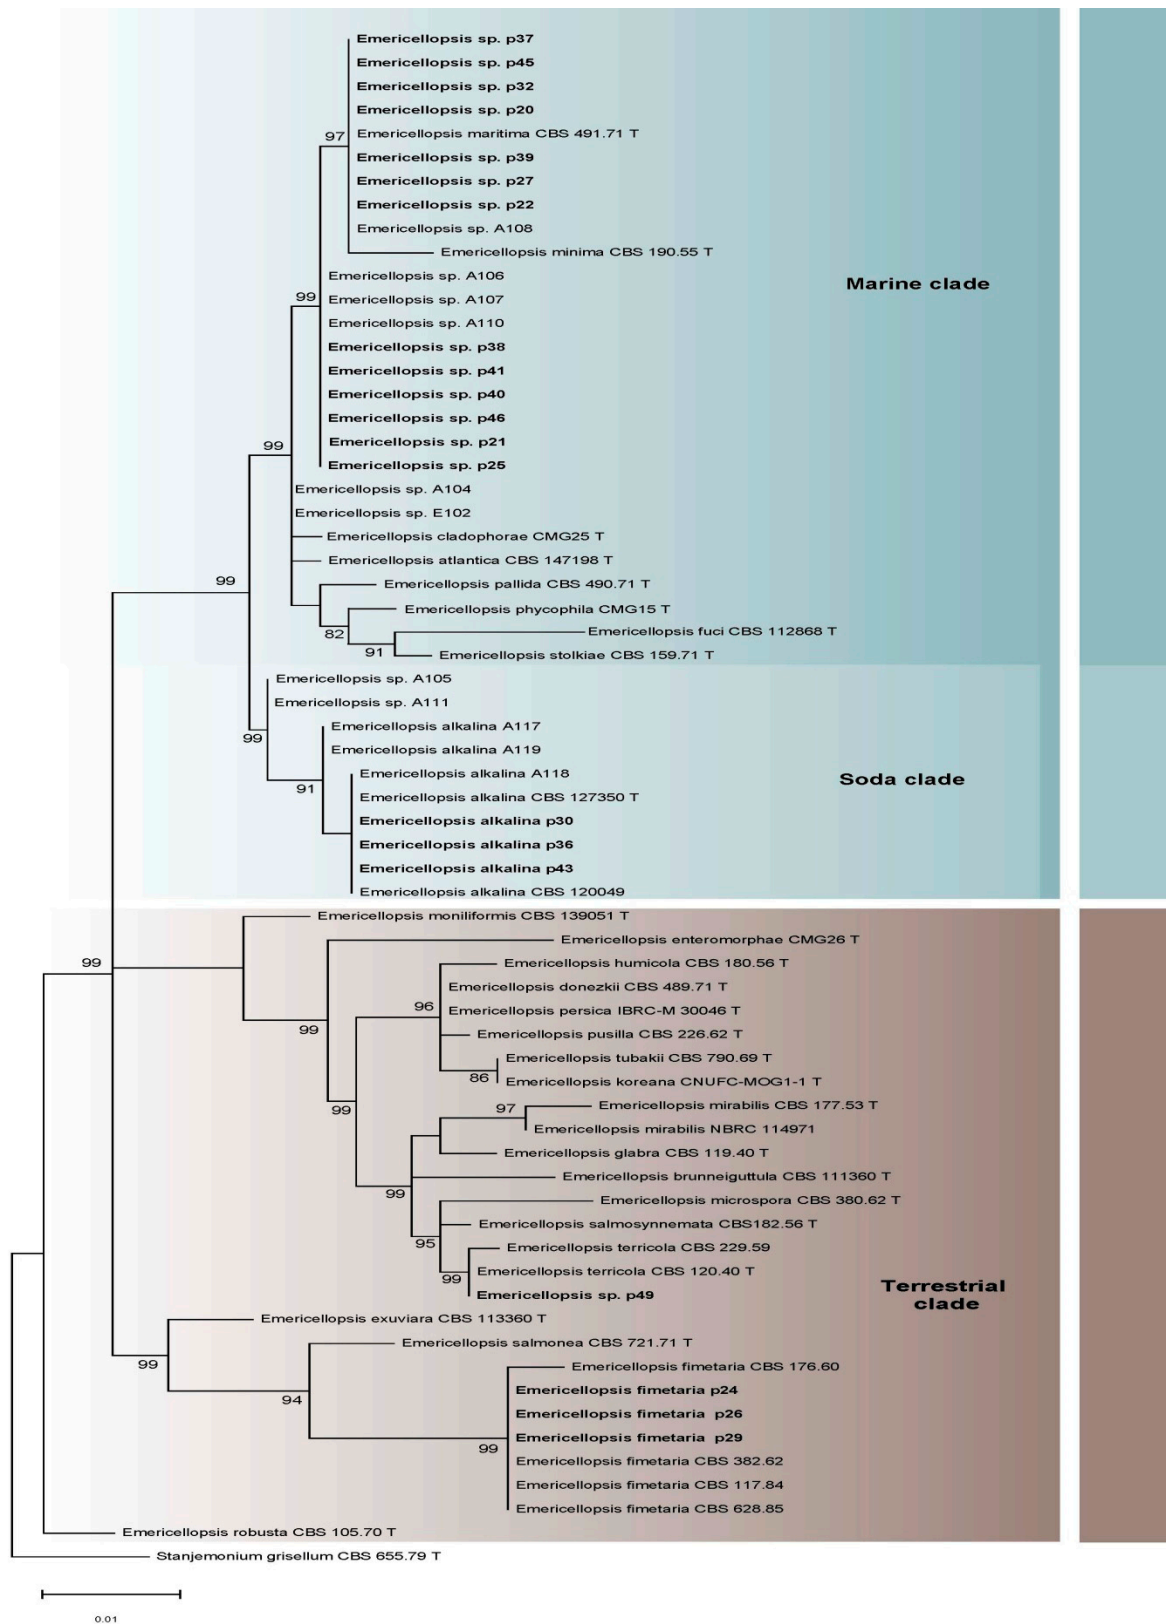

**Figure S2.** Maximum likelihood tree for the *Emericellopsis* genus based on partial sequences for the ITS rDNA (including 5.8S rDNA) region. Branch lengths are proportional to the estimated number of nucleotide substitutions. The BP values are displayed on the nodes (BP; 1000 replicates). *Emericellopsis* spp. and related species were clustered into a “Marine”, “Soda”, or “Terrestrial” clade. Taxa names of the isolates obtained in this study are in bold. “T” beside each strain name indicates the strains as the ex-type strain.

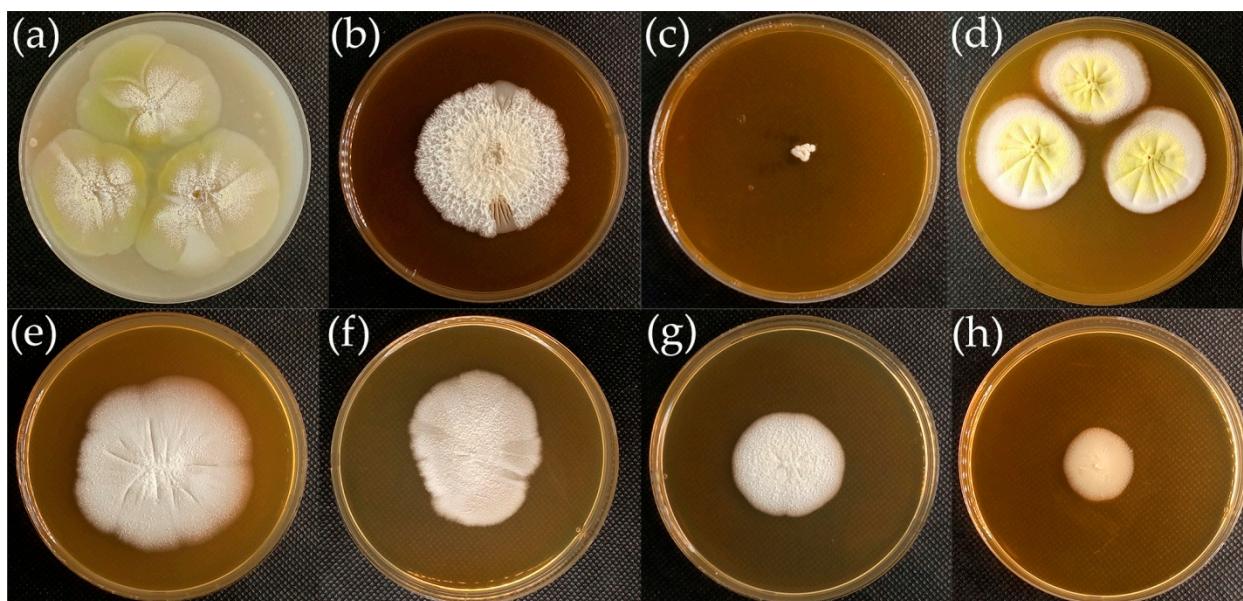

**Figure S3.** *Emericellopsis fimetaria* p24, 14 days-old (25 °C, dark regime) colonies in 9 cm Petri plates: **a** – on OA; **b** – on MYA; **c** – on MYA-based medium buffered at pH 10; **d** – 45 days-old colony on AA; **e–h** – on MYA containing 2.5%, 5%, 7.5% and 10% respectively (w/v) NaCl.



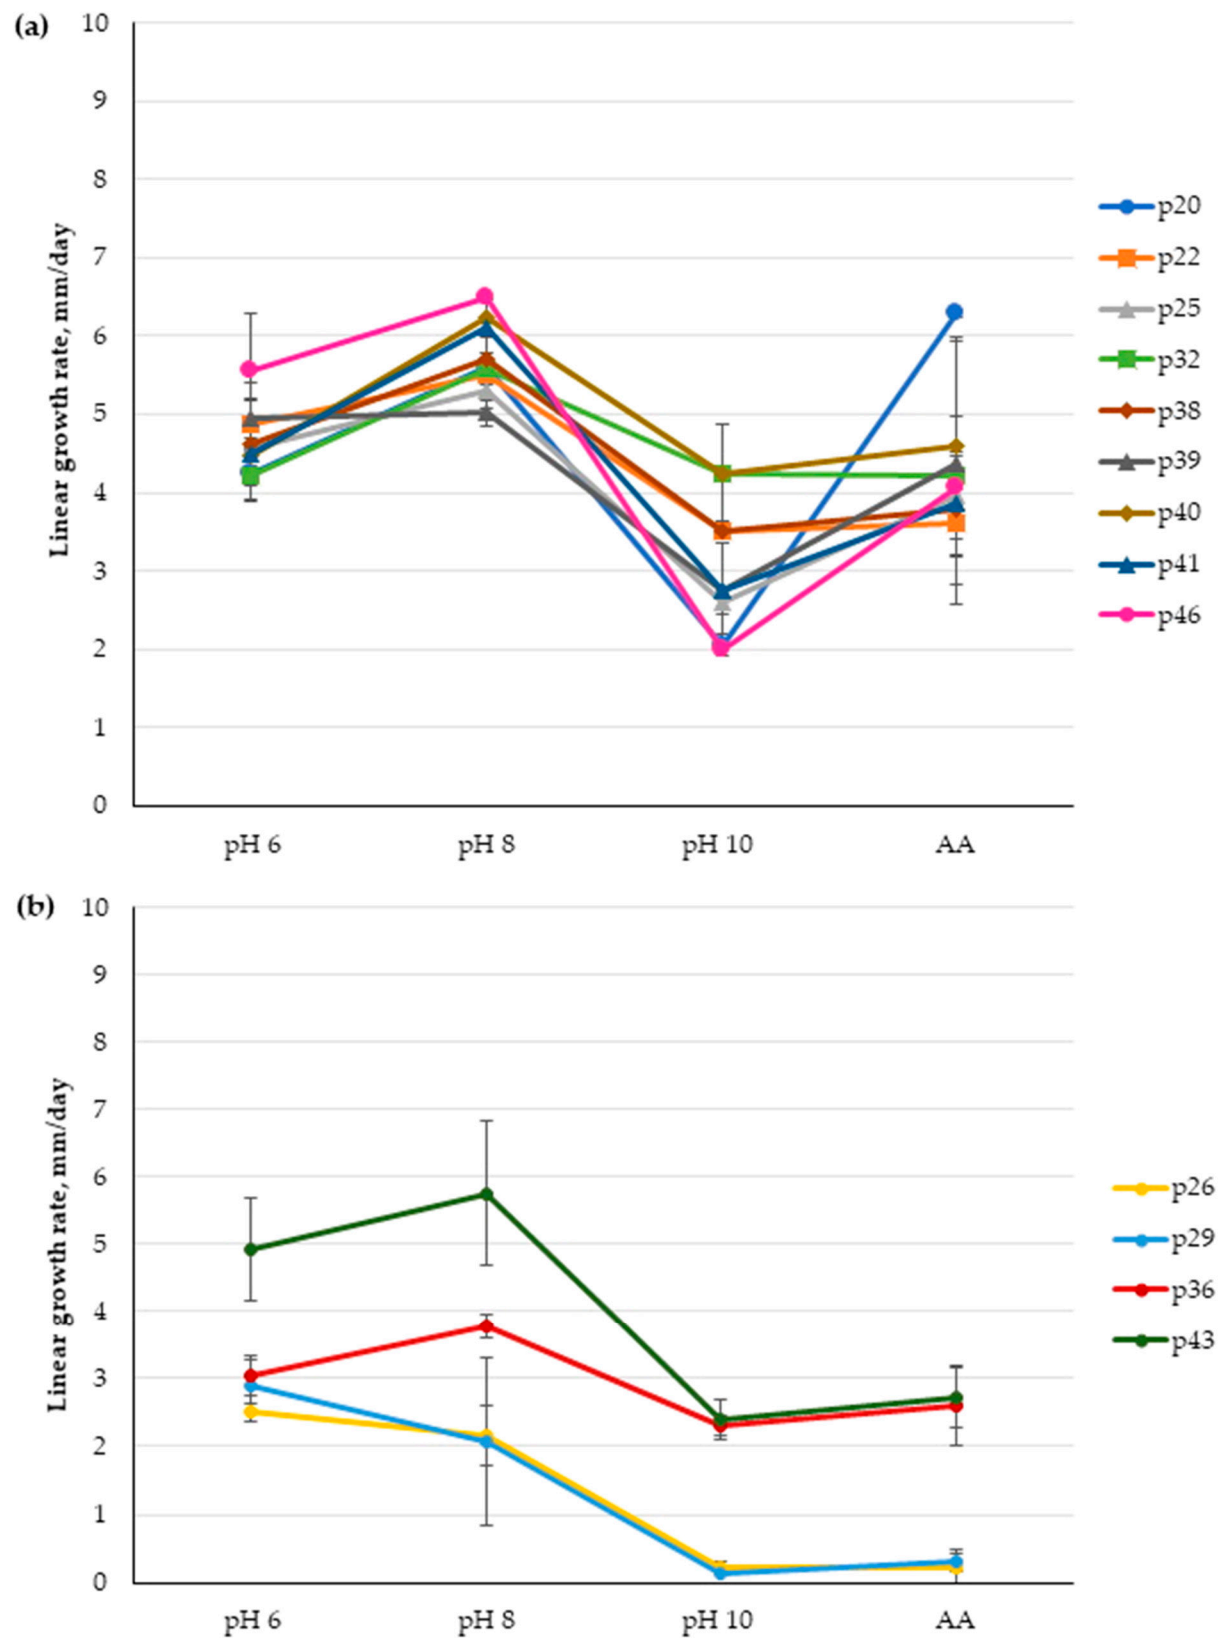

**Figure S4.** Linear growth rate patterns of *Emericellopsis* strains at different pH values. **a** - Marine clade: *Emericellopsis* sp. (p20, p22, p25, p32, p38, p39, p40, p41, p46); **b** - Terrestrial clade: *E. fimetaria* (p26, p29) and Soda clade: *E. alkalina* (p36, p43) ( $n=4$ ,  $\alpha=0.05$ , mean  $\pm$  CI).

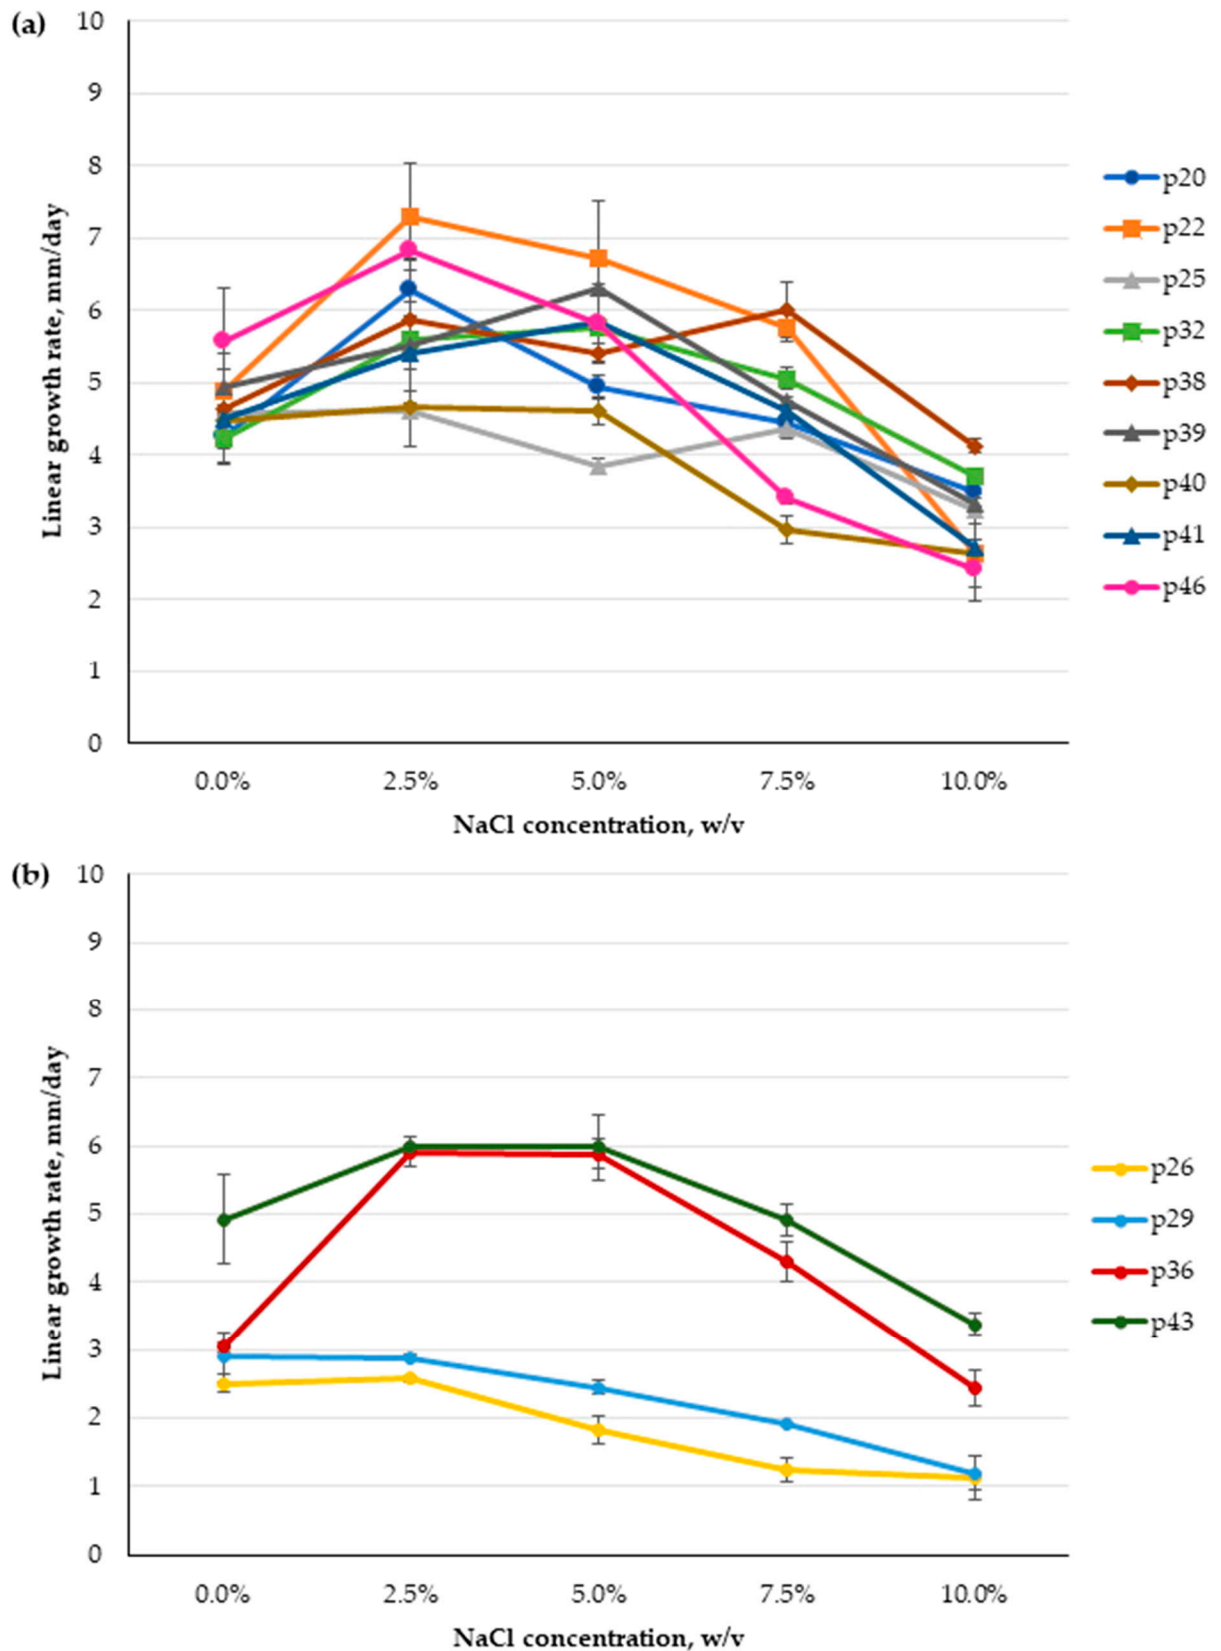

**Figure S5.** Linear growth rate patterns of *Emericellopsis* strains at different NaCl concentrations. **a** - Marine clade: *Emericellopsis* sp. (p20, p22, p25, p32, p38, p39, p40, p41, p46); **b** - Terrestrial clade: *E. fimetaria* (p26, p29) and Soda clade: *E. alkalina* (p36, p43) ( $n=4$ ,  $\alpha=0.05$ , mean $\pm$  CI).

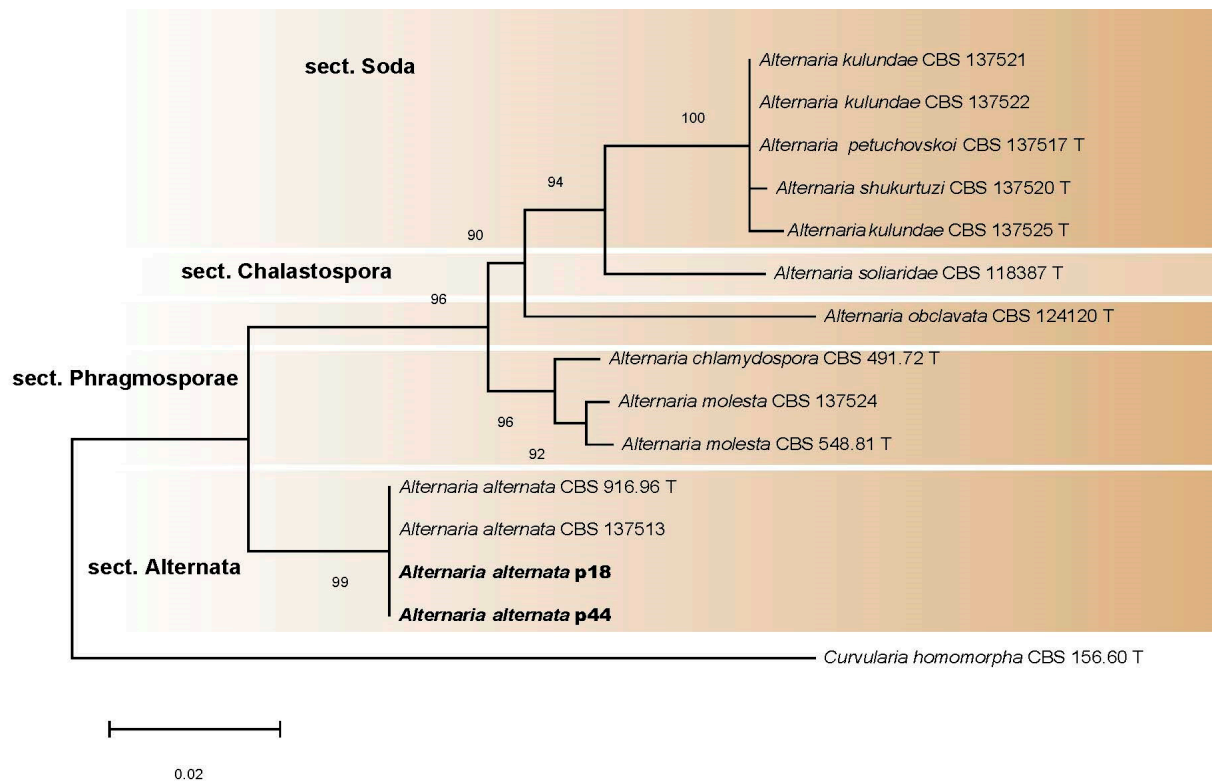

**Figure S6.** Phylogeny of *Alternaria alternata* isolates sequences (marked in bold) and closely related species based on ITS rDNA. ML support values are displayed over each node. T – ex-type strains.

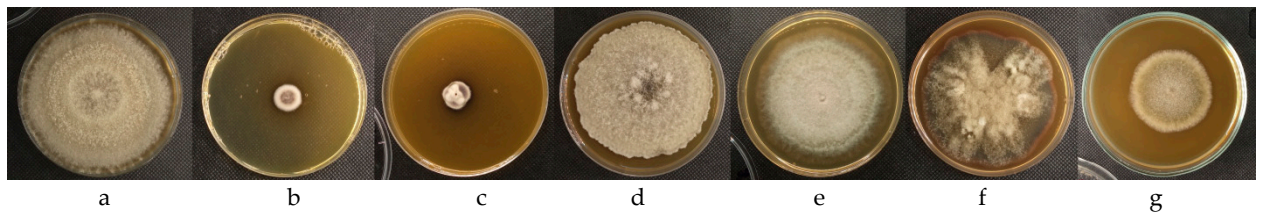

**Figure S7.** *Alternaria alternata*. a–g 14 days-old (25°C, dark regime) colonies in 9 cm Petri plates (isolate p44): a – on MYA medium (pH 6; 0% NaCl); b – on MYA-based media buffered at pH 10; c – on AA; d–g – on MYA containing 2.5%, 5%, 7.5% and 10% respectively (w/v) NaCl.

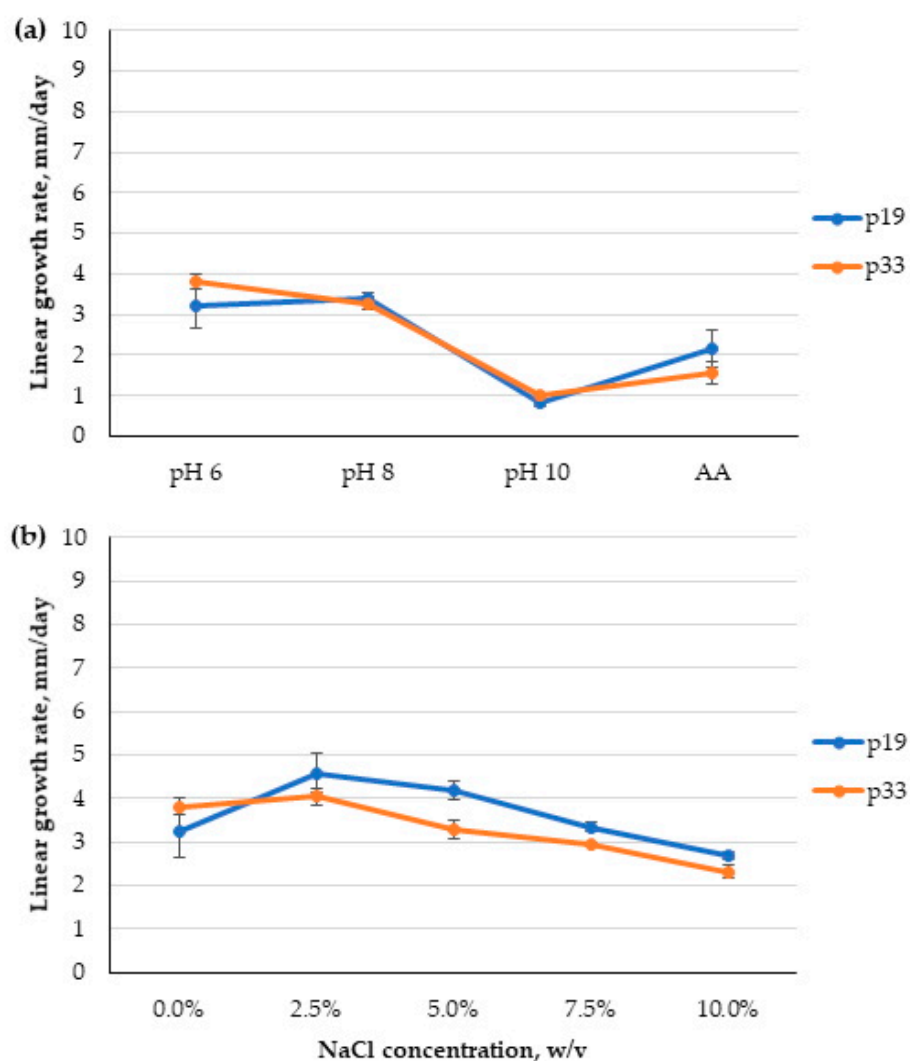

**Figure S8.** Linear growth rate patterns of *Acremonium egyptiacum* (p19 and p33): **a** – at different pH values; **b** – at different NaCl concentrations ( $n=4$ ,  $\alpha=0.05$ , mean  $\pm$  CI).

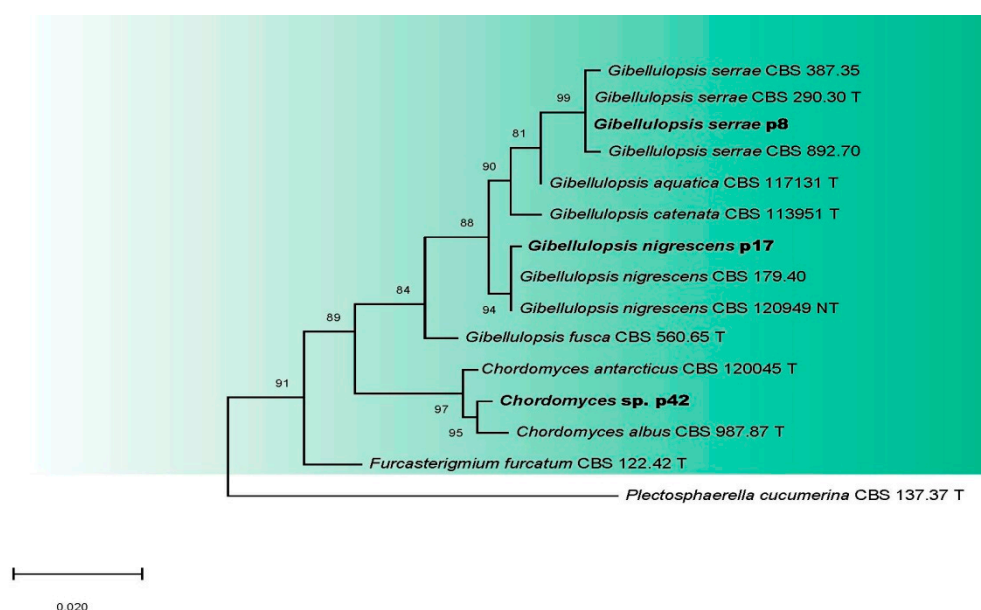

**Figure S9.** Phylogenetic analysis of Plectosphaerellaceae (*Gibellulopsis* and *Chordomyces*) isolates (marked in bold) based on ITS rDNA sequences. ML support values are displayed over each node. T – ex-type strains; NT – neotype strain.

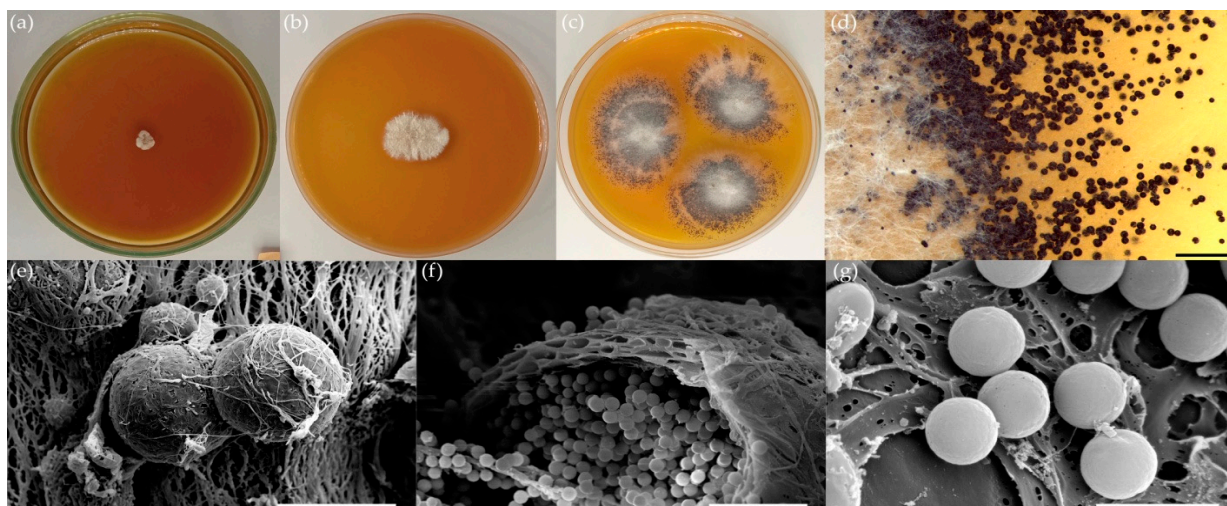

**Figure S10.** *Pseudoeurotium bakeri* (p47). **a–c** 21 days-old (25 °C, dark regime) colonies in 9 cm Petri plates: **a–b** – on MYA containing 5% and 2.5% respectively (w/v) NaCl; **c** – on MYA (0% NaCl, pH 6); **d** – colony margin at MYA with enclosed fruiting bodies (LM); **e** – ascomata fruiting bodies (SEM); **f** – broken asomata cleistothecium with ascospores, note multilayered wall (SEM); **g** – ascospores (SEM). Scale bars: d = 1 mm; e = 100 μm; f = 20 μm; g = 5 μm.

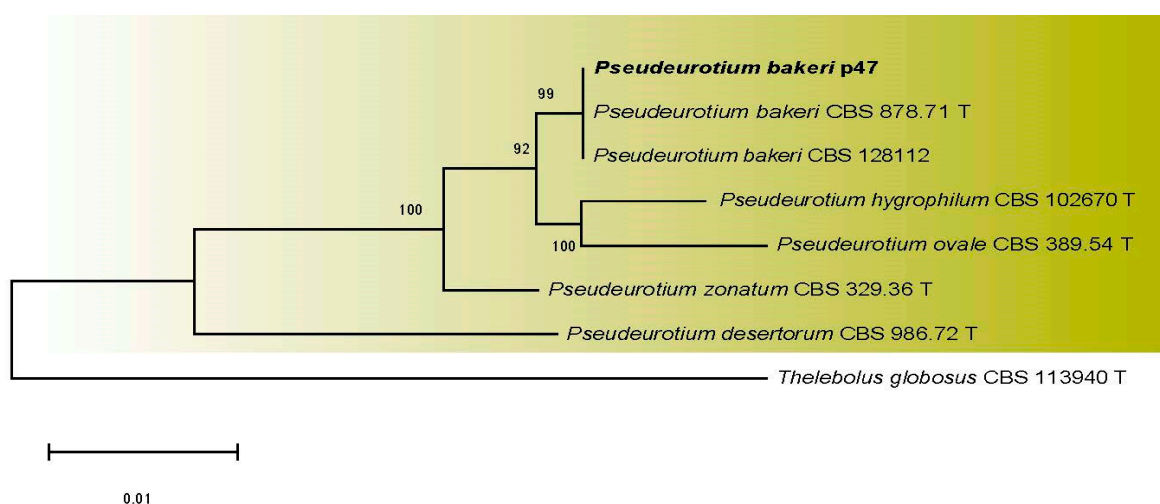

**Figure S11.** ITS rDNA-based phylogeny of the obtained *Pseudoeurotium bakeri* strain p47 (marked in bold) and closely related species. ML support values are displayed over each node. T – ex-type strains.



**Table S2.** Antimicrobial activity of *Emericellopsis* genus

| Strain No | Species                                | Medium | Zone of inhibition, mm      |                                |                             |                                |
|-----------|----------------------------------------|--------|-----------------------------|--------------------------------|-----------------------------|--------------------------------|
|           |                                        |        | <i>E.coli</i><br>ATCC 25922 | <i>B.subtilis</i><br>ATCC 6633 | <i>A.niger</i><br>INA 00760 | <i>C.albicans</i><br>ATCC 2091 |
| p20       | <i>Emericellopsis</i> sp. Marine clade | AA     | 0                           | 12±0.1                         | 22±0.3                      | 32±0.2                         |
|           |                                        | MYA    | 0                           | 13±0.2                         | 0                           | 0                              |
|           |                                        | CZA    | 0                           | 22±0.1                         | 10±0.2                      | 0                              |
| p21       | <i>Emericellopsis</i> sp. Marine clade | AA     | 0                           | 13±0.1                         | 27±0.2                      | 26±0.4                         |
|           |                                        | MYA    | 10±0.1                      | 16±0.1                         | 0                           | 10±0.2                         |
|           |                                        | CZA    | 17±0.3                      | 25±0.1                         | 0                           | 14±0.2                         |
| p22       | <i>Emericellopsis</i> sp. Marine clade | AA     | 0                           | 12±0.1                         | 23±0.3                      | 25±0.1                         |
|           |                                        | MYA    | 0                           | 15±0.2                         | 0                           | 0                              |
|           |                                        | CZA    | 0                           | 22±0.2                         | 9±0.2                       | 0                              |
| p24       | <i>Emericellopsis fimetaria</i>        | AA     | 0                           | 0                              | 0                           | 0                              |
|           |                                        | MYA    | 0                           | 14±0.1                         | 15±0.3                      | 12±0.2                         |
|           |                                        | CZA    | 0                           | 18±0.2                         | 13±0.1                      | 0                              |
| p25       | <i>Emericellopsis</i> sp. Marine clade | AA     | 0                           | 0                              | 0                           | 0                              |
|           |                                        | MYA    | 0                           | 18±0.4                         | 0                           | 0                              |
|           |                                        | CZA    | 13±0.2                      | 16±0.1                         | 0                           | 0                              |
| p26       | <i>Emericellopsis fimetaria</i>        | AA     | 0                           | 0                              | 0                           | 0                              |
|           |                                        | MYA    | 0                           | 18±0.2                         | 0                           | 20±0.2                         |
|           |                                        | CZA    | 0                           | 11±0.3                         | 17±0.3                      | 17±0.2                         |
| p27       | <i>Emericellopsis</i> sp. Marine clade | AA     | 0                           | 15±0.1                         | 22±0.1                      | 10±0.2                         |
|           |                                        | MYA    | 0                           | 16±0.1                         | 10±0.3                      | 0                              |
|           |                                        | CZA    | 0                           | 22±0.3                         | 10±0.3                      | 0                              |
| p29       | <i>Emericellopsis fimetaria</i>        | AA     | 0                           | 0                              | 0                           | 0                              |
|           |                                        | MYA    | 0                           | 11±0.2                         | 16±0.3                      | 12±0.2                         |
|           |                                        | CZA    | 0                           | 11±0.2                         | 0                           | 0                              |
| p30       | <i>Emericellopsis alkalina</i>         | AA     | 0                           | 14±0.1                         | 25±0.3                      | 25±0.4                         |
|           |                                        | MYA    | 0                           | 0                              | 0                           | 0                              |
|           |                                        | CZA    | 14±0.2                      | 0                              | 0                           | 0                              |
| p32       | <i>Emericellopsis</i> sp. Marine clade | AA     | 0                           | 12±0.3                         | 26±0.2                      | 25±0.3                         |
|           |                                        | MYA    | 0                           | 11±0.1                         | 0                           | 9±0.1                          |
|           |                                        | CZA    | 9±0.2                       | 16±0.3                         | 0                           | 13±0.4                         |
| p36       | <i>Emericellopsis alkalina</i>         | AA     | 0                           | 12±0.1                         | 24±0.3                      | 22±0.4                         |
|           |                                        | MYA    | 9±0.2                       | 0                              | 9±0.2                       | 0                              |
|           |                                        | CZA    | 20±0.3                      | 0                              | 12±0.2                      | 0                              |
| p37       | <i>Emericellopsis</i> sp. Marine clade | AA     | 0                           | 13±0.1                         | 22±0.1                      | 10±0.1                         |

|     |                                             |     |        |        |        |        |
|-----|---------------------------------------------|-----|--------|--------|--------|--------|
|     |                                             | MYA | 10±0.3 | 21±0.2 | 0      | 0      |
|     |                                             | CZA | 12±0.1 | 24±0.2 | 0      | 0      |
| p38 | <i>Emericellopsis</i> sp. Marine clade      | AA  | 0      | 11±0.2 | 21±0.4 | 19±0.3 |
|     |                                             | MYA | 0      | 16±0.1 | 0      | 0      |
|     |                                             | CZA | 14±0.2 | 24±0.2 | 0      | 0      |
| p39 | <i>Emericellopsis</i> sp. Marine clade      | AA  | 0      | 21±0.2 | 23±0.2 | 25±0.3 |
|     |                                             | MYA | 0      | 14±0.2 | 0      | 0      |
|     |                                             | CZA | 13±0.1 | 18±0.2 | 0      | 0      |
| p40 | <i>Emericellopsis</i> sp. Marine clade      | AA  | 0      | 12±0.4 | 23±0.2 | 30±0.3 |
|     |                                             | MYA | 0      | 12±0.2 | 0      | 0      |
|     |                                             | CZA | 11±0.1 | 18±0.1 | 0      | 9±0.1  |
| p41 | <i>Emericellopsis</i> sp. Marine clade      | AA  | 9±0.2  | 13±0.3 | 27±0.3 | 28±0.2 |
|     |                                             | MYA | 0      | 17±0.2 | 9±0.1  | 0      |
|     |                                             | CZA | 16±0.1 | 22±0.2 | 10±0.2 | 0      |
| p43 | <i>Emericellopsis alkalina</i>              | AA  | 0      | 0      | 0      | 0      |
|     |                                             | MYA | 0      | 15±0.3 | 9±0.1  | 0      |
|     |                                             | CZA | 0      | 17±0.2 | 0      | 0      |
| p45 | <i>Emericellopsis</i> sp. Marine clade      | AA  | 0      | 0      | 0      | 0      |
|     |                                             | MYA | 10±0.1 | 13±0.1 | 0      | 0      |
|     |                                             | CZA | 14±0.3 | 15±0.2 | 16±0.1 | 0      |
| p46 | <i>Emericellopsis</i> sp. Marine clade      | AA  | 0      | 14±0.1 | 23±0.2 | 22±0.3 |
|     |                                             | MYA | 9±0.1  | 15±0.2 | 11±0.1 | 10±0.1 |
|     |                                             | CZA | 9±0.1  | 15±0.2 | 9±0.1  | 15±0.3 |
| p49 | <i>Emericellopsis</i> sp. Terrestrial clade | AA  | 0      | 0      | 0      | 0      |
|     |                                             | MYA | 9±0.1  | 0      | 0      | 0      |
|     |                                             | CZA | 0      | 0      | 0      | 0      |

Disk diameter – 6 mm

**Table S3.** Antimicrobial activity of other genera obtained.

| Strain No | Species                                                               | Medium | Zone of inhibition, mm   |                             |                          |                             |
|-----------|-----------------------------------------------------------------------|--------|--------------------------|-----------------------------|--------------------------|-----------------------------|
|           |                                                                       |        | <i>E.coli</i> ATCC 25922 | <i>B.subtilis</i> ATCC 6633 | <i>A.niger</i> INA 00760 | <i>C.albicans</i> ATCC 2091 |
| p1        | <i>Penicillium</i> sp. sect. <i>Citrina</i> ser. <i>Copticolorum</i>  | AA     | 0                        | 0                           | 0                        | 0                           |
|           |                                                                       | MYA    | 0                        | 0                           | 14±0.1                   | 0                           |
|           |                                                                       | CZA    | 0                        | 9±0.2                       | 0                        | 0                           |
| p2        | <i>Penicillium</i> sp. sect. <i>Chrysogena</i> ser. <i>Chrysogena</i> | AA     | 0                        | 0                           | 0                        | 0                           |
|           |                                                                       | MYA    | 0                        | 0                           | 0                        | 0                           |
|           |                                                                       | CZA    | 0                        | 0                           | 0                        | 9±0.2                       |
| p301      | <i>Penicillium</i> sp. sect. <i>Chrysogena</i> ser. <i>Chrysogena</i> | AA     | 0                        | 0                           | 0                        | 0                           |
|           |                                                                       | MYA    | 0                        | 0                           | 0                        | 0                           |
|           |                                                                       | CZA    | 0                        | 15±0.3                      | 0                        | 0                           |

|      |                                                                             |     |        |        |        |        |
|------|-----------------------------------------------------------------------------|-----|--------|--------|--------|--------|
| p302 | <i>Penicillium</i> sp. sect. <i>Brevicompecta</i> ser. <i>Brevicompecta</i> | AA  | 0      | 0      | 0      | 0      |
|      |                                                                             | MYA | 0      | 0      | 0      | 0      |
|      |                                                                             | CZA | 0      | 15±0.2 | 0      | 0      |
| p4   | <i>Penicillium</i> sp. sect. <i>Chrysogena</i> ser. <i>Chrysogena</i>       | AA  | 0      | 0      | 0      | 0      |
|      |                                                                             | MYA | 0      | 9±0.1  | 0      | 0      |
|      |                                                                             | CZA | 0      | 9±0.1  | 9±0.2  | 0      |
| p5   | <i>Penicillium</i> sp. sect. <i>Chrysogena</i> ser. <i>Chrysogena</i>       | AA  | 0      | 0      | 0      | 0      |
|      |                                                                             | MYA | 10±0.2 | 10±0.2 | 9±0.1  | 0      |
|      |                                                                             | CZA | 0      | 0      | 0      | 0      |
| p6   | <i>Penicillium</i> sp. sect. <i>Chrysogena</i> ser. <i>Chrysogena</i>       | AA  | 0      | 0      | 0      | 0      |
|      |                                                                             | MYA | 0      | 9±0.1  | 0      | 0      |
|      |                                                                             | CZA | 0      | 16±0.3 | 0      | 0      |
| p48  | <i>Penicillium</i> sp. sect. <i>Brevicompecta</i> ser. <i>Brevicompecta</i> | AA  | 0      | 0      | 0      | 0      |
|      |                                                                             | MYA | 11±0.2 | 0      | 0      | 9±0.2  |
|      |                                                                             | CZA | 0      | 0      | 0      | 0      |
| p10  | <i>Aspergillus</i> sp. sect. <i>Nidulantes</i> ser. <i>Versicolores</i>     | AA  | 0      | 0      | 0      | 0      |
|      |                                                                             | MYA | 0      | 0      | 0      | 0      |
|      |                                                                             | CZA | 0      | 0      | 0      | 0      |
| p11  | <i>Aspergillus</i> sp. sect. <i>Flavipedes</i> ser. <i>Spelaei</i>          | AA  | 0      | 0      | 0      | 0      |
|      |                                                                             | MYA | 0      | 11±0.1 | 0      | 10±0.2 |
|      |                                                                             | CZA | 0      | 9±0.2  | 10±0.3 | 9±0.2  |
| p14  | <i>Aspergillus</i> sp. sect. <i>Flavipedes</i> ser. <i>Flavipedes</i>       | AA  | 0      | 0      | 0      | 0      |
|      |                                                                             | MYA | 0      | 0      | 0      | 0      |
|      |                                                                             | CZA | 9±0.2  | 15±0.3 | 10±0.1 | 14±0.2 |
| p16  | <i>Aspergillus</i> sp. sect. <i>Nidulantes</i> ser. <i>Versicolores</i>     | AA  | 0      | 0      | 0      | 0      |
|      |                                                                             | MYA | 0      | 0      | 0      | 0      |
|      |                                                                             | CZA | 0      | 9±0.1  | 0      | 0      |
| p34  | <i>Aspergillus</i> sp. sect. <i>Flavipedes</i> ser. <i>Spelaei</i>          | AA  | 0      | 0      | 0      | 0      |
|      |                                                                             | MYA | 0      | 13±0.3 | 13±0.2 | 12±0.2 |
|      |                                                                             | CZA | 17±0.3 | 0      | 12±0.2 | 0      |
| p35  | <i>Aspergillus</i> sp. sect. <i>Flavipedes</i> ser. <i>Flavipedes</i>       | AA  | 0      | 0      | 0      | 0      |
|      |                                                                             | MYA | 0      | 18±0.3 | 0      | 9±0.1  |
|      |                                                                             | CZA | 0      | 18±0.2 | 0      | 9±0.2  |
| p7   | <i>Fusarium</i> sp. complex <i>incarnatum-equiseti</i>                      | AA  | 0      | 0      | 0      | 0      |
|      |                                                                             | MYA | 0      | 18±0.2 | 0      | 19±0.3 |
|      |                                                                             | CZA | 0      | 17±0.2 | 0      | 16±0.2 |
| p9   | <i>Fusarium</i> sp. complex <i>solani</i>                                   | AA  | 0      | 0      | 0      | 0      |
|      |                                                                             | MYA | 0      | 0      | 0      | 0      |
|      |                                                                             | CZA | 0      | 9±0.2  | 10±0.2 | 0      |

|     |                                                 |     |        |        |        |        |
|-----|-------------------------------------------------|-----|--------|--------|--------|--------|
| p12 | <i>Fusarium</i> sp. complex incarnatum-equiseti | AA  | 0      | 0      | 0      | 0      |
|     |                                                 | MYA | 0      | 15±0.1 | 16±0.1 | 15±0.3 |
|     |                                                 | CZA | 0      | 12±0.2 | 0      | 14±0.2 |
| p13 | <i>Fusarium</i> sp. complex solani              | AA  | 0      | 0      | 0      | 0      |
|     |                                                 | MYA | 0      | 0      | 0      | 0      |
|     |                                                 | CZA | 0      | 0      | 0      | 0      |
| p28 | <i>Fusarium</i> sp. complex burgessii           | AA  | 0      | 0      | 0      | 0      |
|     |                                                 | MYA | 0      | 13±0.3 | 17±0.1 | 0      |
|     |                                                 | CZA | 0      | 14±0.1 | 17±0.2 | 0      |
| p8  | <i>Gibellulopsis serra</i>                      | AA  | 0      | 0      | 0      | 0      |
|     |                                                 | MYA | 0      | 0      | 0      | 0      |
|     |                                                 | CZA | 0      | 0      | 0      | 0      |
| p17 | <i>Gibellulopsis nigrescens</i>                 | AA  | 0      | 0      | 0      | 0      |
|     |                                                 | MYA | 0      | 0      | 0      | 0      |
|     |                                                 | CZA | 10±0.2 | 9±0.1  | 9±0.1  | 0      |
| p18 | <i>Alternaria alternata</i>                     | AA  | 0      | 0      | 0      | 0      |
|     |                                                 | MYA | 0      | 15±0.3 | 14±0.2 | 0      |
|     |                                                 | CZA | 0      | 0      | 0      | 11±0.2 |
| p44 | <i>Alternaria alternata</i>                     | AA  | 0      | 0      | 0      | 0      |
|     |                                                 | MYA | 0      | 12±0.1 | 0      | 9±0.2  |
|     |                                                 | CZA | 0      | 0      | 13±0.3 | 9±0.2  |
| p19 | <i>Acremonium egyptiacum</i>                    | AA  | 0      | 12±0.1 | 23±0.2 | 28±0.3 |
|     |                                                 | MYA | 0      | 11±0.1 | 9±0.2  | 10±0.2 |
|     |                                                 | CZA | 18±0.3 | 0      | 9±0.1  | 0      |
| p33 | <i>Acremonium egyptiacum</i>                    | AA  | 0      | 0      | 0      | 0      |
|     |                                                 | MYA | 0      | 15±0.2 | 0      | 0      |
|     |                                                 | CZA | 0      | 0      | 0      | 0      |
| p15 | <i>Myriodontium keratinophilum</i>              | AA  | 0      | 0      | 0      | 0      |
|     |                                                 | MYA | 0      | 14±0.1 | 0      | 14±0.2 |
|     |                                                 | CZA | 0      | 0      | 0      | 0      |
| p47 | <i>Pseudeurotium bakeri</i>                     | AA  | 0      | 0      | 0      | 0      |
|     |                                                 | MYA | 0      | 15±0.2 | 0      | 10±0.2 |
|     |                                                 | CZA | 0      | 0      | 0      | 0      |
| p42 | <i>Chordomyces</i> sp.                          | AA  | 0      | 13±0.2 | 23±0.3 | 17±0.1 |
|     |                                                 | MYA | 0      | 0      | 0      | 0      |
|     |                                                 | CZA | 0      | 0      | 0      | 0      |

Disk diameter – 6 mm
